# Supplementary material for: Garlic Substrate Induces Cucumber Growth Development and Decreases Fusarium Wilt through Regulation of Soil Microbial Community Structure and Diversity in Replanted Disturbed Soil
Source: MDPI journal article supplement (doi:10.3390/ijms21176008), 2020-08-20
Supplement: s1 [file s1]

# **Garlic Substrate Induces Cucumber Growth Development and Decreases Fusarium Wilt through Regulation of Soil Microbial Community Structure and Diversity in Replanted Disturbed Soil**

Ahmad Ali <sup>a,b</sup>, Muhammad Imran Ghani <sup>a</sup>, Haiyan Ding <sup>a</sup>, Muhammad Iqbal <sup>c</sup>, Zhihui Cheng<sup>a,\*</sup>,  
Zucong Cai <sup>b,d,e</sup>

<sup>a</sup> *College of Horticulture, Northwest A&F University, Yangling, Shaanxi 712100, China.*

<sup>b</sup> *School of Geography Science, Nanjing Normal University, Nanjing 210023, China*

<sup>c</sup> *Institute of Soil Science, PMAS-Arid Agriculture University, Rawalpindi-46300, Pakistan..*

<sup>d</sup> *State Key Laboratory Cultivation Base of Geographical Environment Evolution 14, Nanjing 210023, China*

<sup>e</sup> *Jiangsu Provincial Key Laboratory of Materials Cycling and Pollution Control, Nanjing Normal University, Nanjing 210023, China*

\*Corresponding Author: Zhihui Cheng

E-mail: chengzh@nwsuaf.edu.cn

Phone number: +86 29 87091332

Fax number: +86 29 87082613

## ***Supporting Information***

3 Tables

2 Figure

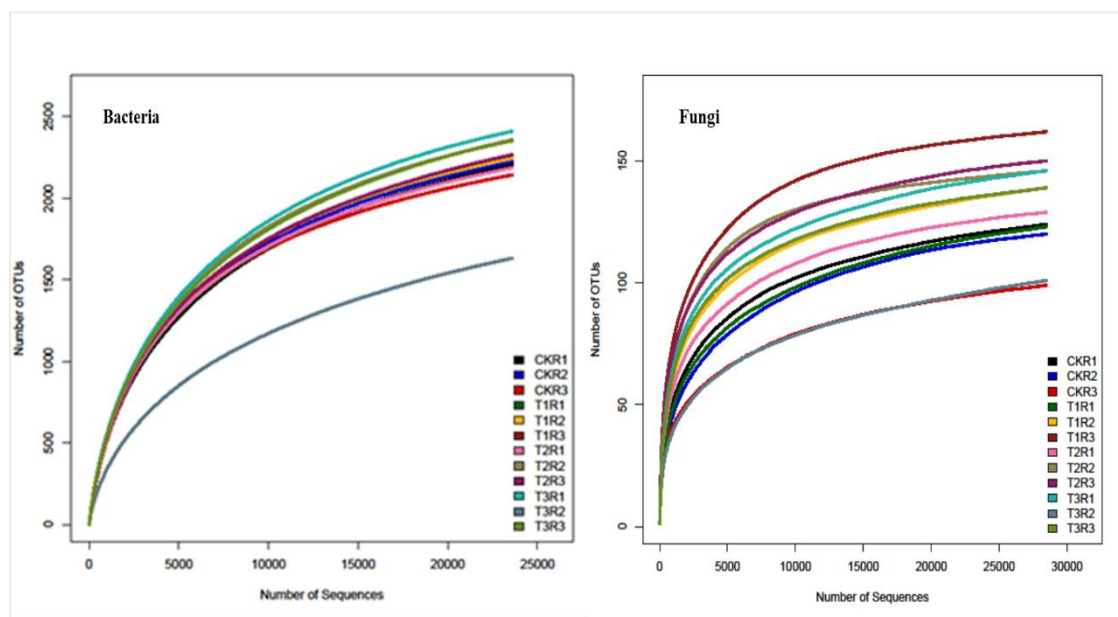

**Figure S1.** Rarefaction curves of bacterial and fungal communities based on observed OTUs at 3% distance associated with different soil samples.

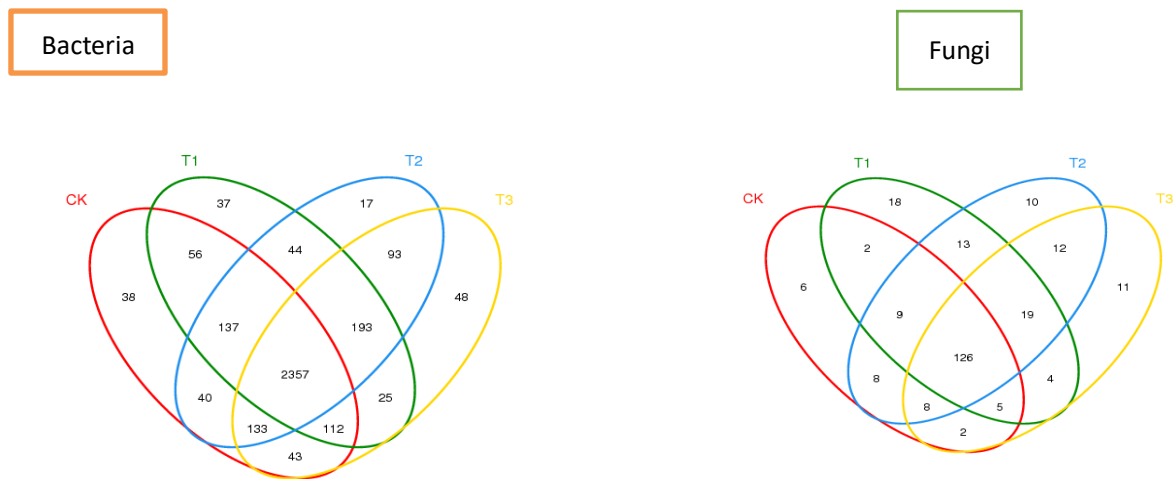

**Figure S2.** A Venn diagram displaying the degree of overlap of bacterial OTUs (a) and fungal (b) at the 3% evolutionary distance among the four treatments.

Calculations based description of Venn diagram based on OTUs in term of uniqueness and shareness among different soil samples.

| Bacteria                                                                                              |                      |                          |                                                                               | Fungi                                       |                                                                       |                                               |                              |
|-------------------------------------------------------------------------------------------------------|----------------------|--------------------------|-------------------------------------------------------------------------------|---------------------------------------------|-----------------------------------------------------------------------|-----------------------------------------------|------------------------------|
| Total OUT in individual samples                                                                       |                      | Unique OTUs              | Shared OTUs (b/w treatments)                                                  | Unique OTUs                                 |                                                                       | Shared OTUs(b/w treatments)                   |                              |
| Total OTUs identified in 4 treatment samples:<br>2918,ck)+(2961,T1)<br>+(3014,T2)+(3004,T3)<br>=11897 | CK:2918<br>(24.52%)  | CK: 38<br>(1.30%)        | CK-T1:<br>56+137+2357+112=2662                                                | CK: 6                                       | CK-T1:<br>5+126+9+2=152                                               | Total OTUs identified in 4 treatment samples: |                              |
|                                                                                                       | T1:2961<br>(24.88%)  | T1: 37<br>(1.24%)        | CK-T2:<br>T2:137+40+133+2357=2667                                             | T1: 18                                      | CK-T2:<br>9+126+8+8=151                                               |                                               |                              |
|                                                                                                       | T2: 3014<br>(25.33%) | T2: 17<br>(0.56%)        | CK-T3:<br>2357+133+43+112=2645                                                | T2: 10                                      | CK-T3:126+5+8+2=141                                                   |                                               |                              |
|                                                                                                       | T3:3004<br>(25.25%)  | T3: 48<br>(1.59%)        | T1-T2:<br>44+137+193+2357=2731                                                | T3: 11                                      | T1-T2:13+9+126+19=167                                                 |                                               |                              |
|                                                                                                       |                      |                          | T1-T3: 2357+112+25= 2494                                                      |                                             | T1-T3:19+4+5+126=154                                                  |                                               |                              |
|                                                                                                       |                      |                          | T2-T3:<br>93+193+2357+133=2776*                                               |                                             | T2-T3:12+19+126+8=165                                                 |                                               |                              |
|                                                                                                       |                      |                          | Overall total OTUs in sheerness:<br>2662+2667+2645+2731+<br>2494 + 2776=15975 | Overall total unique OTUs:<br>6+18+10+11=45 | Overall total OTUs in sheerness:<br>152+151+141+167+<br>154 + 165=930 |                                               |                              |
|                                                                                                       |                      | Remarks:                 |                                                                               |                                             |                                                                       |                                               |                              |
|                                                                                                       |                      | Highest Unique.<br>T3:48 | Max shared OTUs: T2-T3<br>(2776)                                              |                                             |                                                                       | Highest Unique.<br>T1:18                      | Max shared OTUs: T1-T2 (167) |

**Table S1.** Pearson correlations between crop yields, Fusarium wilt incidence rate % and primary environmental parameters.

| Pearson's correlation between crop yield Fusarium wilt incidence rate % and soil properties |               |       |               |               |               |               |               |               | Cat. |
|---------------------------------------------------------------------------------------------|---------------|-------|---------------|---------------|---------------|---------------|---------------|---------------|------|
|                                                                                             | CY            | pH    | OM            | AN            | AP            | AK            | Inv.          | UR            |      |
| pH                                                                                          | -.634         |       |               |               |               |               |               |               |      |
| OM                                                                                          | <b>.995**</b> | -.589 |               |               |               |               |               |               |      |
| AN                                                                                          | .780          | -.012 | <b>.974*</b>  |               |               |               |               |               |      |
| AP                                                                                          | <b>.975*</b>  | -.152 | .888          | <b>.988*</b>  |               |               |               |               |      |
| AK                                                                                          | .566          | .235  | .580          | .902          | .833          |               |               |               |      |
| Inv.                                                                                        | <b>.979*</b>  | -.565 | <b>.973*</b>  | <b>.987*</b>  | .874          | .478          |               |               |      |
| UR.                                                                                         | .945          | -.550 | <b>.970*</b>  | <b>.994**</b> | .879          | .485          | <b>.996**</b> |               |      |
| FWI.                                                                                        | <b>-.961*</b> | -.784 | <b>-.953*</b> | -.868         | -.847         | <b>-.972*</b> | -.879         | -.870         |      |
| A. POH.                                                                                     | <b>.959*</b>  | -.656 | <b>.973*</b>  | .724          | <b>.982**</b> | .409          | <b>.993**</b> | <b>.991**</b> | .915 |

\*. Correlation is significant at the 0.05 level (2-tailed).  
 \*\*. Correlation is significant at the 0.01 level (2-tailed).

**CY:** Crop Yield; **FWI:** Fusarium wilt incidence rate %; **EC:** Electrical Conductivity; **OM:** Organic Matter; **AN:** Available Nitrogen; **AK:** Available Potassium; **Inv:** Invertase; **UR:** Urease; **A. POH:** Alkaline phosphatase

**Table S2.** Correlation analysis between cucumber yield, Fusarium incidence% and microbial richness and diversity indices.

|                 |         | Cucumber Yield | Fusarium incidence% |
|-----------------|---------|----------------|---------------------|
| <b>Bacteria</b> | OTUs    | <b>.978*</b>   | -.861               |
|                 | ACE     | <b>.960*</b>   | -.771               |
|                 | Chao1   | .911           | <b>-.957*</b>       |
|                 | Shannon | <b>.973*</b>   | <b>-.974*</b>       |
| <b>Fungi</b>    | OTUs    | .888           | -.864               |
|                 | ACE     | .853           | -.752               |
|                 | Chao1   | .615           | .864                |
|                 | Shannon | .854           | <b>-.971*</b>       |

\*Correlation is significant at the 0.05 level (2-tailed).

\*\*Correlation is significant at the 0.01 level (2-tailed).

Alpha diversity indices of community richness index (OTU, Chao1, and ACE)

Community diversity index (Shannon)

OTU: Observed species

**Table S3.** Basic characteristics of replanted soil and garlic substrate before experiment

| <b>Parameters</b>                      | <b>Replanted soil</b> | <b>Garlic substrate</b> |
|----------------------------------------|-----------------------|-------------------------|
| Soil pH (1:5 soil: water)              | 7.75                  | 7.25                    |
| EC ( $\mu\text{s cm}^{-1}$ )           | 582                   | 671                     |
| Total organic C ( $\text{g kg}^{-1}$ ) | 13.59                 | 411.39                  |
| Total N ( $\text{g kg}^{-1}$ )         | 1.438                 | 8.43                    |
| C:N                                    | 9.45                  | 49                      |
| Total P ( $\text{g kg}^{-1}$ )         | 0.93                  | 18.74                   |
| Total K ( $\text{g kg}^{-1}$ )         | 7.15                  | 10.27                   |
| Available N ( $\text{mg kg}^{-1}$ )    | 53.65                 | -                       |
| Available P ( $\text{mg kg}^{-1}$ )    | 59.41                 | -                       |
| Available K ( $\text{mg kg}^{-1}$ )    | 305.91                | -                       |
